# Supplementary material for: Establishing a Metabolite Extraction Method to Study the Metabolome of Blastocystis Using NMR
Source: MDPI journal article supplement (doi:10.3390/molecules26113285), 2021-05-29
Supplement: s1 [file s1]

**Table S1.**  $C \mu M_{E/M}$  for a selection of metabolites extracted from the ethanol vs methanol experiment. 1A, 1B and 1C = ethanol and 2A, 2B and 2C = methanol. The data is displayed as a metabolite concentration ratio using the 'equation  $n = C \mu M_{ethanol} / C \mu M_{methanol}$ ' so numbers above 1 represent a positive result for Ethanol and numbers below 1 represent a positive result for methanol. The median, standard deviation = stdev and coefficient of variance = C.V were all calculated with and without outliers. **Outliers in red.**

|                      | 1A<br>v<br>2A | 1B<br>v<br>2B | 1C<br>v<br>2C | Median | stddev | C.V  | Median<br>inc<br>outliers | stddev inc<br>outliers | C.V inc<br>outliers |
|----------------------|---------------|---------------|---------------|--------|--------|------|---------------------------|------------------------|---------------------|
| Arabinitol           | 4.81          | 0.68          | 0.12          | 0.40   | 0.39   | 0.98 | 1.87                      | 2.56                   | 1.37                |
| Formate              | 1.38          | 0.70          | 0.59          | 0.89   | 0.43   | 0.48 | 0.89                      | 0.43                   | 0.48                |
| Alanine              | 4.00          | 0.78          | 0.23          | 0.50   | 0.39   | 0.77 | 1.67                      | 2.04                   | 1.22                |
| Acetate              | 1.09          | 0.52          | 0.46          | 0.69   | 0.35   | 0.51 | 0.69                      | 0.35                   | 0.51                |
| Succinate            | 3.83          | 0.74          | 0.90          | 0.82   | 0.11   | 0.14 | 1.82                      | 1.74                   | 0.96                |
| 3-Hydroxyisovalerate | 2.43          | 0.92          | 0.60          | 0.76   | 0.23   | 0.30 | 1.32                      | 0.98                   | 0.74                |

**Table S2.**  $C \mu M_{E/M}$  for a selection of metabolites extracted from the sonication vs bead bashing experiment. 3A, 3B and 3C = sonication and 4A, 4B and 4C = bead bashing. The data is displayed as a metabolite concentration ratio using the 'equation  $n = C \mu M_{sonication} / C \mu M_{bead\ bashing}$ ' so numbers above 1 represent a positive result for sonication and numbers below 1 represent a positive result for bead bashing. The median, standard deviation = stdev and coefficient of variance = C.V were all calculated with and without outliers. **Outliers in red.**

|            | 3A v<br>4A | 3B v<br>4B | 3C v<br>4C | Median | stddev | C.V  | Median<br>inc<br>outliers | stddev inc<br>outliers | C.V inc<br>outliers |
|------------|------------|------------|------------|--------|--------|------|---------------------------|------------------------|---------------------|
| Arabinitol | 1.31       | 0.94       | 0.86       | 1.03   | 0.24   | 0.23 | 1.03                      | 0.24                   | 0.23                |
| Formate    | 1.00       | 0.97       | 0.14       | 0.99   | 0.02   | 0.02 | 0.70                      | 0.49                   | 0.70                |
| Alanine    | 1.02       | 0.97       | 2.58       | 1.00   | 0.03   | 0.03 | 1.52                      | 0.91                   | 0.60                |
| Glycine    | 1.00       | 1.00       | 0.54       | 0.85   | 0.26   | 0.31 | 0.85                      | 0.26                   | 0.31                |
| Acetamide  | 0.95       | 0.91       | 0.48       | 0.78   | 0.26   | 0.34 | 0.78                      | 0.26                   | 0.34                |

**Table S3.**  $C \mu M_{E/M}$  for a selection of metabolites extracted from the RT vs -20°C incubation experiment. 5A, 5B and 5C = RT and 6A, 6B and 6C = -20°C. The data is displayed as a metabolite concentration ratio using the 'equation  $n = C \mu M_{RT} / C \mu M_{-20^\circ C}$ ' so numbers above 1 represent a positive result for RT incubation and numbers below 1 represent a positive result for -20°C incubation. The median, standard deviation = stdev and coefficient of variance = C.V were all calculated.

|            | 5A v 6A | 5B v 6B | 5C v 6C | Median | Stddev | C.V  |
|------------|---------|---------|---------|--------|--------|------|
| Arabinitol | 0.84    | 1.17    | 1.09    | 1.03   | 0.17   | 0.16 |
| Formate    | 1.09    | 0.91    | 0.82    | 0.94   | 0.14   | 0.15 |
| Alanine    | 0.85    | 1.10    | 1.16    | 1.03   | 0.17   | 0.16 |
| Acetate    | 1.29    | 0.99    | 0.89    | 1.06   | 0.21   | 0.19 |
| Succinate  | 0.88    | 1.04    | 1.05    | 0.99   | 0.10   | 0.10 |
| Glycine    | 0.84    | 0.79    | 1.02    | 0.88   | 0.12   | 0.13 |

**Table S4.**  $C \mu M_{E/M}$  for a selection of metabolites extracted from the 60°C vs -20°C incubation experiment. 7A, 7B and 7C = 60°C and 8A, 8B and 8C = -20°C. The data is displayed as a metabolite concentration ratio using the 'equation  $n = C \mu M_{60^\circ C} / C \mu M_{-20^\circ C}$ ' so numbers above 1 represent a positive result for 60°C incubation and numbers below 1 represent a positive result for -20°C incubation. The median, standard deviation = stdev and coefficient of variance = C.V were all calculated.

|            | 7A v 8A | 7B v 8B | Median | stddev | C.V  |
|------------|---------|---------|--------|--------|------|
| Arabinitol | 1.00    | 0.91    | 0.96   | 0.06   | 0.07 |
| Formate    | 0.65    | 0.68    | 0.67   | 0.02   | 0.03 |
| Alanine    | 0.97    | 0.64    | 0.81   | 0.24   | 0.29 |
| Acetate    | 0.89    | 0.93    | 0.91   | 0.03   | 0.03 |
| Succinate  | 1.06    | 0.98    | 1.02   | 0.05   | 0.05 |
| Glycine    | 1.01    | 1.02    | 1.01   | 0.01   | 0.01 |

**Table S5.** Metabolites extracted by the optimal extraction method and their concentrations.

| Metabolite no | Metabolite                  | Concentration ( $\mu M$ ) | Chemical shifts (ppm)                    |
|---------------|-----------------------------|---------------------------|------------------------------------------|
| 1             | Arabinitol                  | 15.9                      | 3.56, 3.66, 3.66, 3.68, 3.75, 3.84, 3.93 |
| 2             | Formate                     | 11.1                      | 8.44.                                    |
| 3             | Alanine                     | 6.9                       | 1.47, 3.78                               |
| 4             | Trehalose                   | 6.8                       | 5.18, 3.85, 3.8, 3.76, 3.44              |
| 5             | Acetate                     | 5.5                       | 1.91.                                    |
| 6             | sn-Glycero-3-phosphocholine | 5.1                       | 3.21, 3.61, 3.66, 3.87, 3.92, 3.94, 4.32 |
| 7             | Betaine                     | 5                         | 3.26, 3.89                               |
| 8             | Cadaverine                  | 4.8                       | 1.46, 1.71, 3.02                         |
| 9             | Ethylene glycol             | 3.2                       | 3.66.                                    |
| 10            | Galactitol                  | 2.9                       | 3.68, 3.97                               |
| 11            | Galactonate                 | 2.7                       | 3.64, 3.69, 3.71, 3.97, 4.27             |
| 12            | Leucine                     | 2.1                       | 0.95, 0.96, 1.68, 1.7, 1.73, 3.73        |
| 13            | 1,3-Diaminopropane          | 2.1                       | 2.07, 2.08, 3.11, 3.13,                  |
| 14            | Malonate                    | 1.4                       | 3.12.                                    |
| 15            | Succinate                   | 1.2                       | 2.4.                                     |

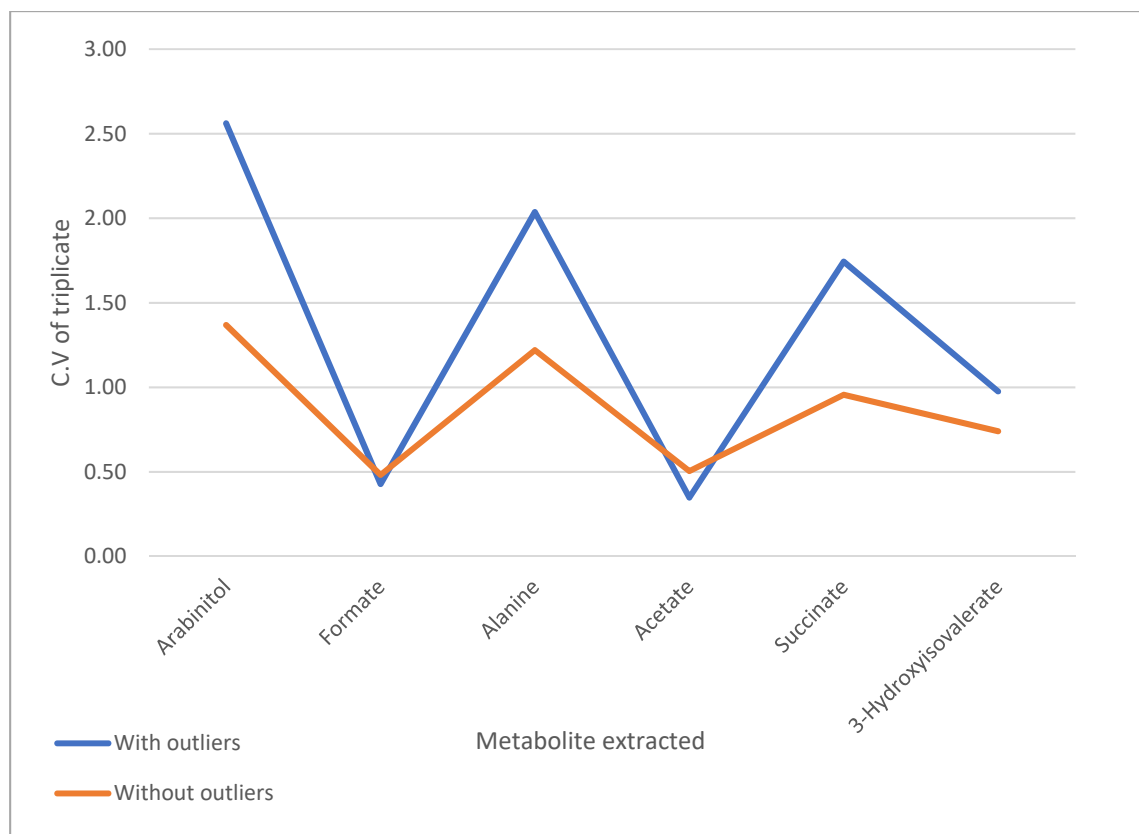

**Figure S1.** Reproducibility of the ethanol extractions against the methanol extractions - C.Vs of ethanol vs methanol metabolites extracted with outliers and without outliers.

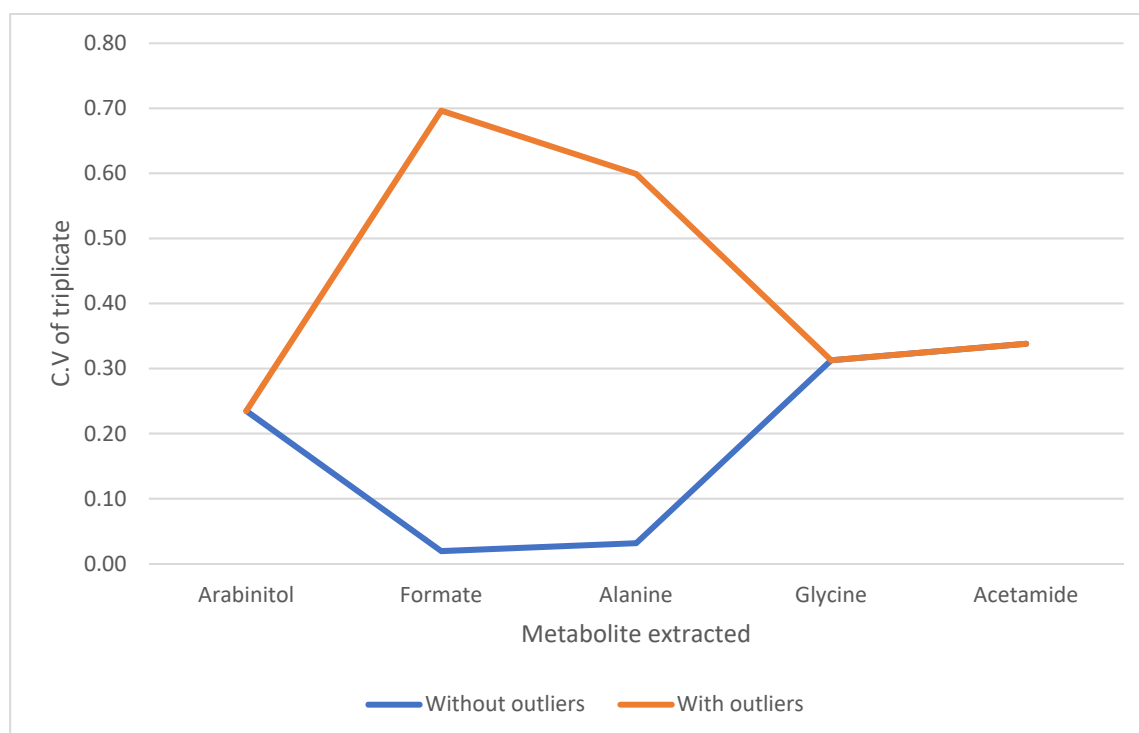

**Figure S2.** Reproducibility of sonication lysis against bead-bashing lysis. C.Vs of sonication vs bead bashing metabolites extracted with outliers and without outliers.

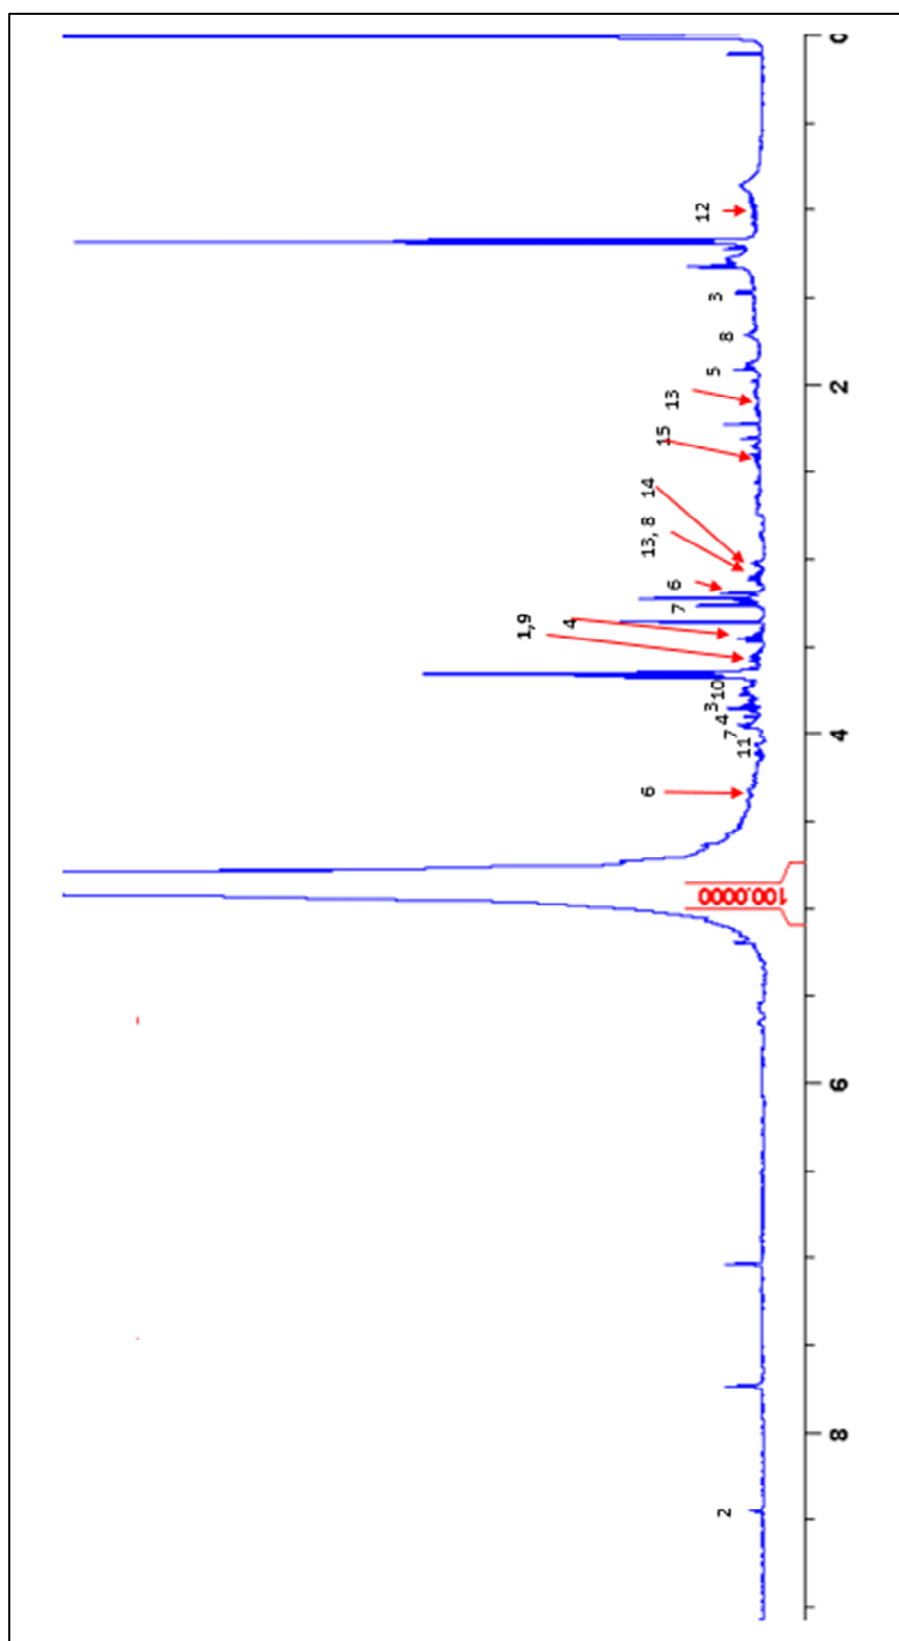

**Figure S3.** Spectrum obtained from the optimal extraction protocol deduced from this study. Using methanol as the extraction solvent, bead bashing as the lysis method and incubation at RT.
